# Supplementary material for: Reduction of carbon dioxide with mesoporous SnO2 nanoparticles as active photocatalysts under visible light in water
Source: Royal Society of Chemistry journal article supplement (doi:10.1039/c9cy01568j), 2019-01-01
Supplement: c9cy01568j1.pdf [file c9cy01568j1.pdf]

## **Supporting Information**

### **Reduction of carbondioxide with mesoporous SnO<sub>2</sub> nanoparticles as active photocatalysts under visible light in Water**

Arpita Hazra Chowdhury,<sup>a</sup> Anjan Das,<sup>a</sup> Sk Riyajuddin,<sup>b</sup> Kaushik Ghosh,<sup>b</sup> Sk. Manirul Islam<sup>\*a</sup>

<sup>a</sup>Department of Chemistry, Kalyani University, Kalyani, West Bengal, 741235, India

<sup>b</sup>Institute of Nano Science and Technology, Mohali, 160062, India

#### **Contents**

|                                                                                                        |              |
|--------------------------------------------------------------------------------------------------------|--------------|
| 1. Materials and Instrumentation .....                                                                 | Page S2-S3   |
| 2. Synthesis of mesoporous Tin Oxide... ..                                                             | Page S3      |
| 3. <b>Figure S1-S10.</b> Characterizations of Tin Oxide.....                                           | Page S3-S10  |
| 4. <b>Figure S11.</b> Reaction set-up .....                                                            | Page S10-S11 |
| 5. <b>Figure S12.</b> Calculation of products' yields.....                                             | Page S11     |
| 6. <b>Figure S13.</b> UV Spectra of HCOOH in H <sub>2</sub> O for different intensities of light ..... | Page S12     |
| 7. <b>Figure S14. Figure S14.</b> HPLC chromatogram.....                                               | Page S12     |
| 8. <b>Figure S15.</b> GC chromatogram.....                                                             | Page S13     |
| 9. <b>Figure S16.</b> <sup>1</sup> H NMR spectra of formic acid.....                                   | Page S14     |
| 10. <b>Figure S17.</b> <sup>13</sup> C NMR spectra of formic acid.....                                 | Page S14     |
| 9. <b>References</b> .....                                                                             | Page S15     |

## Materials

$\text{SnCl}_4 \cdot 5\text{H}_2\text{O}$ , SDS and ammonium hydroxide ( $\text{NH}_4\text{OH}$ , 25% aqueous) were purchased from E-Merk, India. Deionized (DI) water was used for all the experiments wherever needed. All the reactions were performed using oven-dried glassware under ambient atmosphere unless otherwise mentioned.

## Instrumentation

Absorption spectroscopy: UV-Vis absorption spectrum of the catalyst was recorded on SHIMADZU, UV-2600 UV-Vis spectrometer with a standard 1 cm x 1 cm cuvette.

NMR Spectra:  $^1\text{H}$  &  $^{13}\text{C}$  NMR Proton and  $^{13}\text{C}$  Carbon nuclear magnetic resonance spectra were recorded on a Bruker 400 MHz spectrometer. Chemical shifts for protons and  $^{13}\text{C}$  Carbon are reported in parts per million (ppm).

PXRD: The PXRD analysis was performed by using an X-ray diffractometer (BRUKER, Powder X-Ray eco D8 ADVANCE) equipped with Ni-filtered  $\text{Cu K}_\alpha$  ( $\lambda = 0.15406$  nm) radiation.

IR Spectra: The FTIR spectra of the materials were recorded from a Perkin-Elmer spectrophotometer (FT-IR 783) on KBr pellets.

SEM: FESEM images of the catalyst were acquired by using Scanning Electron Microscope (SEM) [JEOL JSM IT 300].

TEM: Transmission Electron Microscope (TEM) [JEOL JEM 2100] was used to obtain the morphological information of the sample.

RAMAN: RAMAN spectrum of the catalyst was recorded by Confocal Raman Spectrometer [WITEC alpha 300 R].

TGA: The thermal stability of the COF material was analyzed by a Thermogravimetric Analyzer [SDT Q600 V20.9 Build 20].

BET: The N<sub>2</sub> adsorption-desorption analysis of TFPD-DAAQ COF sample was conducted by using a BET Surface Analyzer [QUANTACHROME ASIQC602-5].

### **Synthesis of Mesoporous TinOxide**

The SnO<sub>2</sub> nanomaterial was prepared by using SnCl<sub>4</sub>.5H<sub>2</sub>O and anionic surfactant SDS as Sn source and templating materials respectively. 3 mmol of SDS was first dissolved in 25 mL of water in ice-cold condition followed by addition of 9 mmol of SnCl<sub>4</sub> and the mixture was stirred for 1h. After that aqueous ammonium hydroxide solution was drop-wise added to the mixture in ice-cold condition maintaining the pH of the solution at ca. 4 followed by stirring for further 1h. Then the solution was aged for one day in ice-cold temperature at static condition. The white precipitate of tin oxide was then collected by centrifugation and washed it by using simple washing technique used in previously reported literatures [1,2] with DI water and acetone for multiple times to remove the template material as much as possible. People also used solvent extraction method for simple removal of template material [3]. However, we dried the synthesized material at 60 °C for 2 h.

### **Characterizations**

#### **PXRDAnalysis**

The diffraction peaks present in the PXRD pattern (Figure S1) of the synthesized material clearly matched with the characteristic diffraction pattern of tin oxide material of JCPDS card no. 41-1445, having diffraction planes (110), (101), (211), and (112). Therefore, the wide-angle PXRD

analysis of the synthesized sample confirms the production of SnO<sub>2</sub> nanomaterial. The calculated crystallite sizes of the SnO<sub>2</sub> particles from the XRD data using Scherrer equation are very small (~3 nm). To understand the mesoporosity from PXRD analysis we have done the small angle PXRD study (Figure S2) of the synthesized SnO<sub>2</sub> sample where we have seen a single diffraction hump at low 2θ value which indicated the presence of meso-phases in the sample [3].

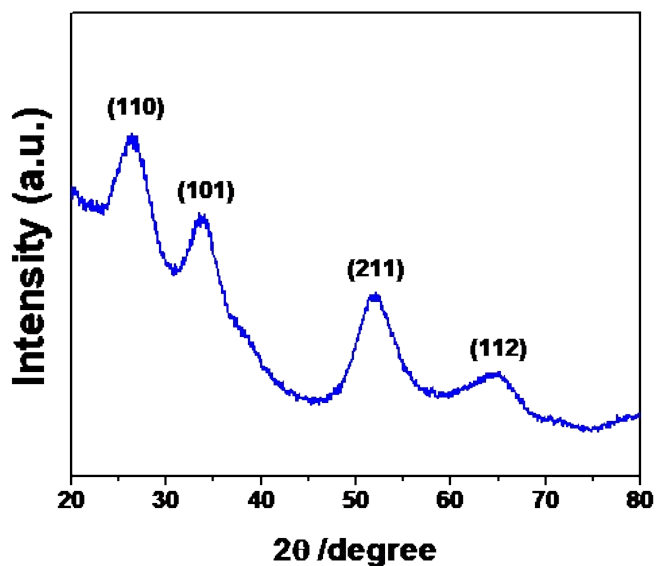

Figure S1. XRD pattern of the synthesized SnO<sub>2</sub> sample.

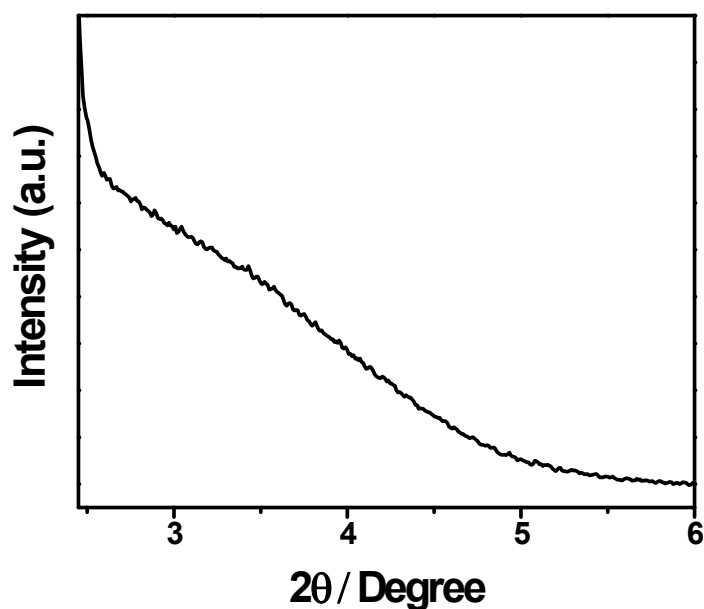

**Figure S2.** Small angle XRD patterns of SnO<sub>2</sub> material.

### FTIR Analysis

The FTIR spectra (Figure S3) of the prepared sample indicated a broad intense band at 620 Cm<sup>-1</sup> which corresponds to stretching of Sn-O bond [4] confirming the synthesis of SnO<sub>2</sub>. The small peaks at 2861 and 2946 Cm<sup>-1</sup> are due to C-H vibrations of the organic template SDS. Band at 3400 Cm<sup>-1</sup> corresponds to the vibration mode of O-H bond of physisorbed water molecules [5].

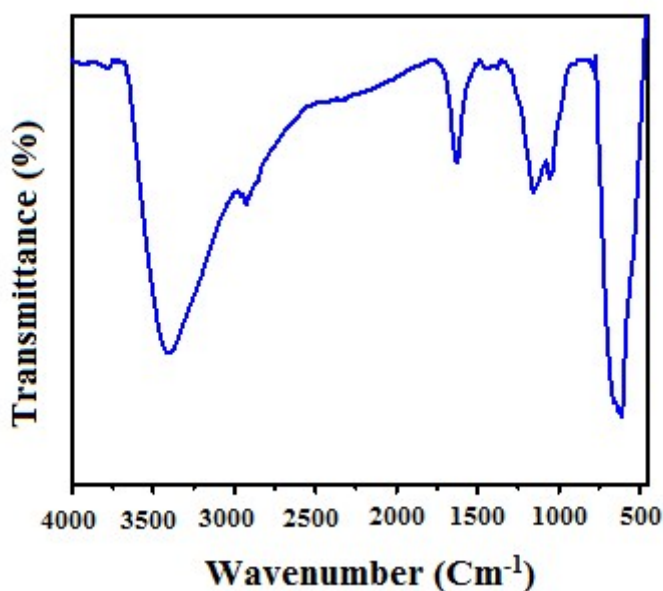

**Figure S3.** FTIR spectra of the SnO<sub>2</sub> sample.

### RAMAN Analysis

The RAMAN spectra of the synthesized tin oxide material is shown in Figure S4. The peak at 470 Cm<sup>-1</sup> corresponds to E<sub>g</sub> mode originating from the mode of vibration of the oxide ions present in the SnO<sub>2</sub> nanomaterial [6]. The small peak at 772 Cm<sup>-1</sup> corresponds to B<sub>2g</sub> mode originating from the Sn-O bond asymmetric stretching. The broad and strong band at 577 Cm<sup>-1</sup> is

not generally observed in RAMAN spectra of SnO<sub>2</sub> material. The band arises due to the presence of very small size SnO<sub>2</sub> nanoparticles [7], which supports the XRD data.

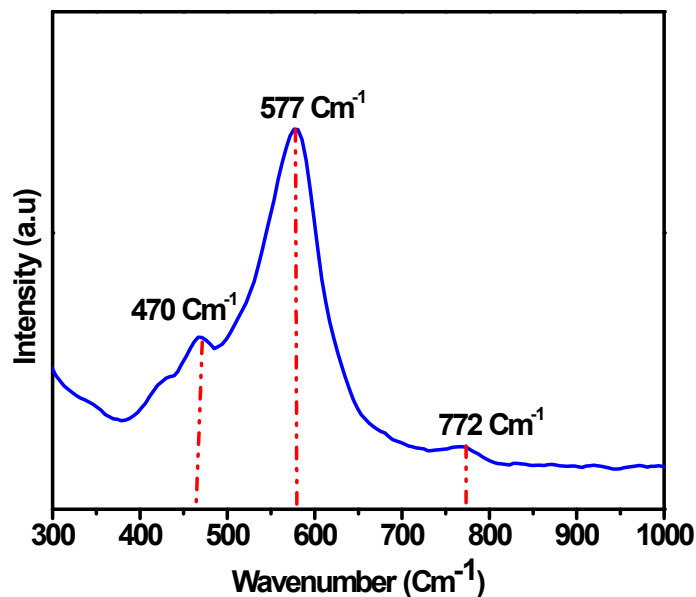

**Figure S4.** RAMAN spectra of the SnO<sub>2</sub> material.

### UV-vis Analysis

UV-visspectroscopy (Figure S5)of the SnO<sub>2</sub> material was done to analyze its optical absorbance and band gap energy. The band gap energy was calculated by using the following equation [8]:

$$E_g = (1239.8 / \lambda)$$

Where, E<sub>g</sub> = Energy band gap and

$\lambda$  = Absorption edge wavelength (nm) in the spectrum

The E<sub>g</sub> from this equation is calculated to be 2.92 eV which suggests the electron transfer occurs from valance band to conduction band under visible light irradiation.

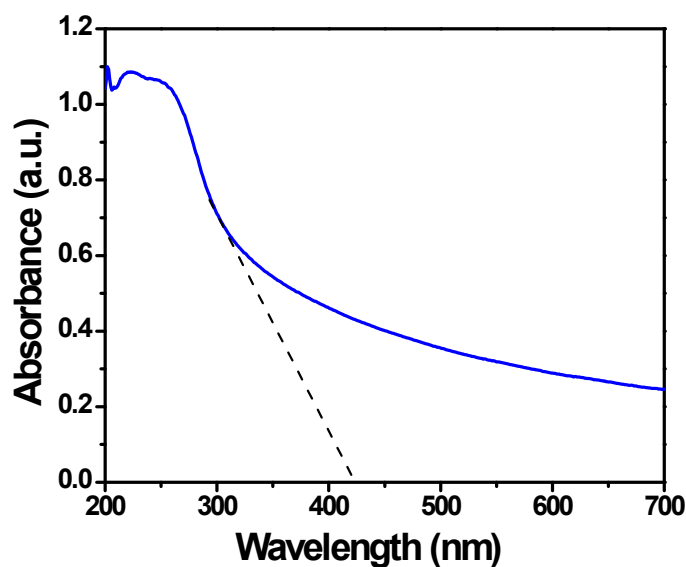

**Figure S5.**UV-vis spectra of the SnO<sub>2</sub> material.

### **N<sub>2</sub> adsorption–desorption Analysis**

The N<sub>2</sub> adsorption–desorption isotherm of the SnO<sub>2</sub> material (Figure S6) signifies the existence of type IV isotherm with H3 hysteresis loop signifying the presence of slit like mesopores. The BJH PSD (pore size distribution) plot originating from the desorption data showed that the sample has a narrow pore size distribution with pore diameter 3.6 nm which falls in the mesoporous region. The material has high BET surface area of 165.765 m<sup>2</sup>g<sup>-1</sup> and total pore volume of 0.21 cm<sup>3</sup>g<sup>-1</sup>.

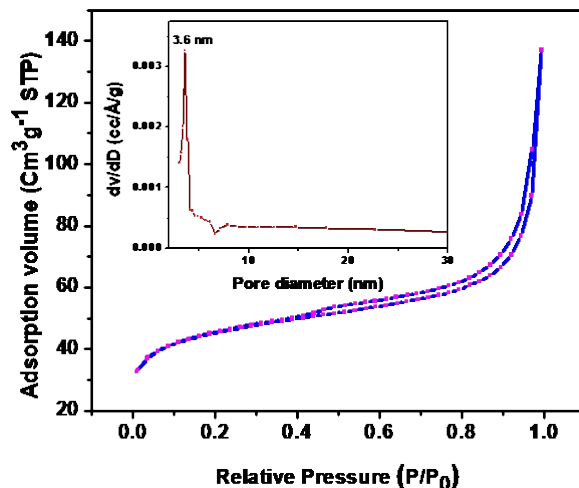

**Figure S6.** N<sub>2</sub> adsorption–desorption isotherm of the SnO<sub>2</sub> material at 77 K. Pore size distribution is shown in the inset.

### Thermal Analysis

The thermal stability of the SnO<sub>2</sub> material was analyzed by thermogravimetric analysis of the sample. The thermogravimetric plot (Figure S7) of the material indicates that there are three step weight losses occurred. First step weight loss (~ 15%) upto 130°C corresponds to desorption of surface adsorbed water. The further two step weight losses upto 460°C correspond to the decomposition of small amount of organic templating agent. There was no further noticeable weight loss occurred above 460°C temperature.

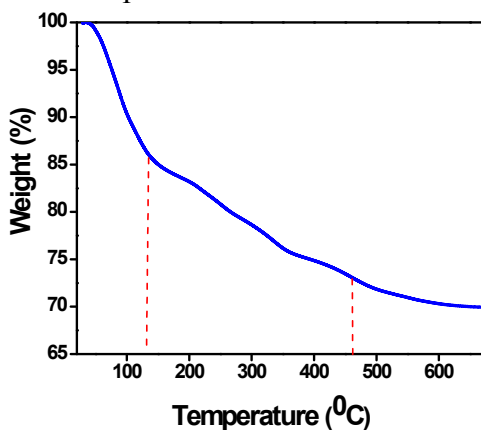

**Figure S7.** TGA plot of the SnO<sub>2</sub> material.



## Microscopic Analysis

The morphological characteristics of the mesoporous  $\text{SnO}_2$  material were studied by FESEM (Figure S8a, b) and TEM (Figure S9a, b) analysis. The FESEM images suggested that Small  $\text{SnO}_2$  nanoparticles are aggregated to for bigger size particles. The TEM image (Figure S9a) clearly indicates the existence of inter-particle porosity in the material. From the HRTEM image (Fig. S9b)of the  $\text{SnO}_2$ sample, the d-spacings are calculated 0.267nm and 0.34 nm which correspond to (101) and (110) planes of  $\text{SnO}_2$  respectively. The elemental composition (Sn and O) of the material is confirmed by the EDAX pattern (Figure S10).

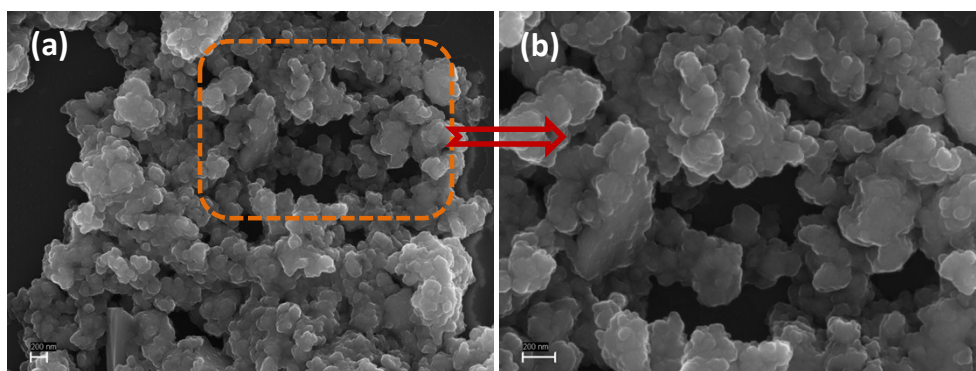

**Figure S8.**FE-SEM images of  $\text{SnO}_2$  material at two different magnifications.

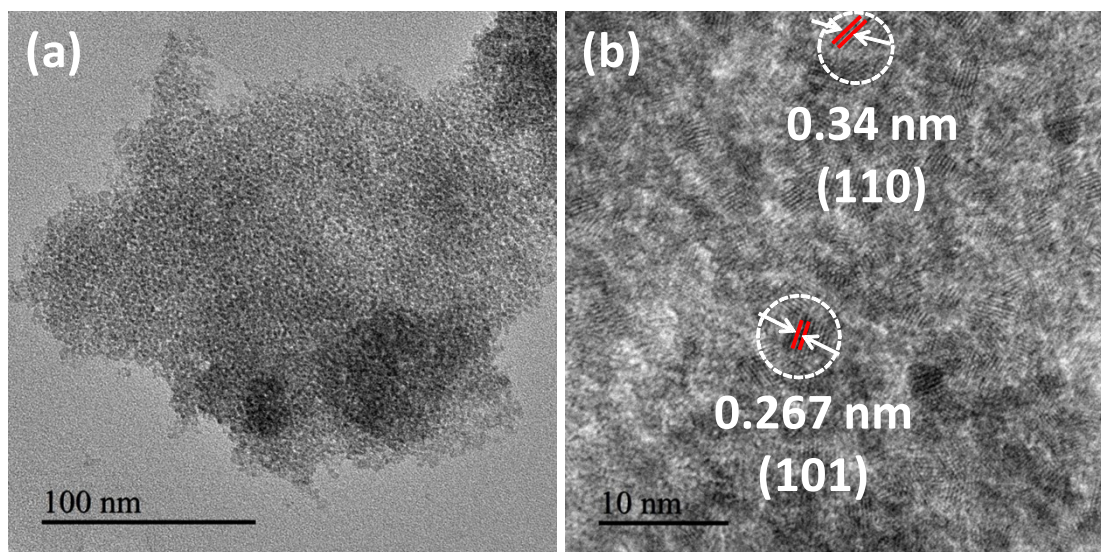

**Figure S9.**TEM image of  $\text{SnO}_2$  material(a), lattice fringes (b)

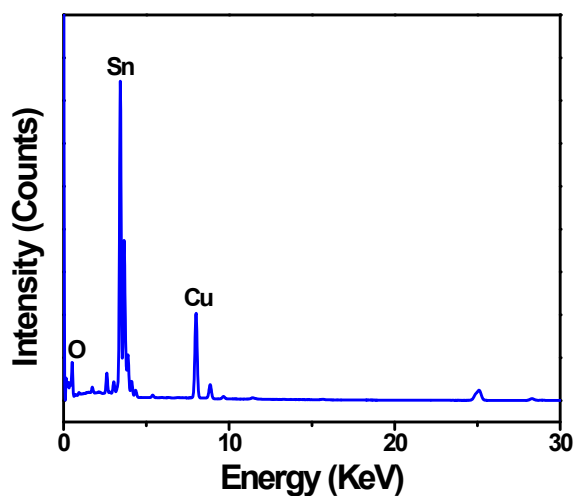

**Figure S10.** EDAX pattern of SnO<sub>2</sub> sample.

#### **Reaction set-up:**

#### **Procedure of formation of Formic acid using mesoporous SnO<sub>2</sub> Photocatalyst:**

The photocatalytic reduction of CO<sub>2</sub>(1 atm) into Formic acid was performed using only 5 mL H<sub>2</sub>O in presence of 10 mg of SnO<sub>2</sub> in a 25 mL round bottom flask. The reaction was allowed to run under irradiation of the white LED light at room temperature for 6 h under continuous stirring (Figure S11). At the end of the reaction, SnO<sub>2</sub> was separated by filtration and the filtrate was analyzed by <sup>1</sup>H and <sup>13</sup>C NMR Spectra which confirms the formation of HCOOH. The yield of formic acid produced was detected by using UV-Visible spectrophotometer.

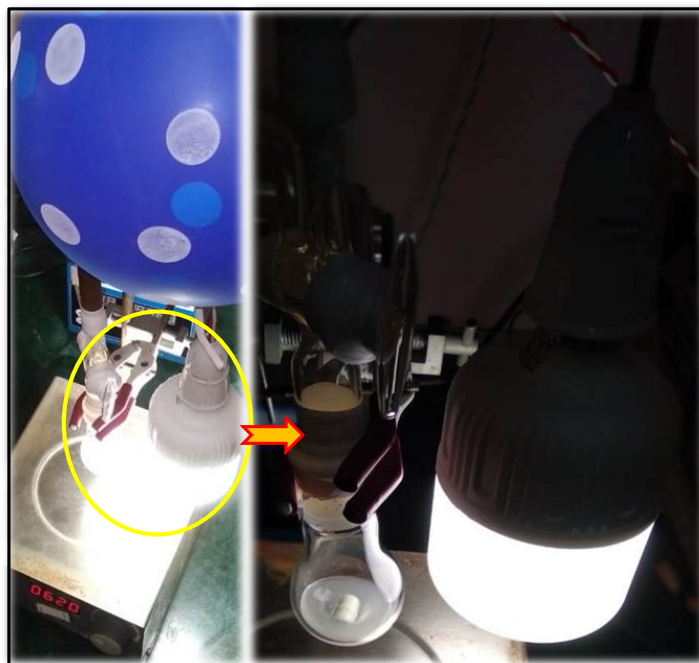

**Figure S11.** Photo of the photoreaction setup with CO<sub>2</sub> balloon directly irradiated with white LED light.

#### Calculation of product's yields:

Reaction yields were evaluated using calibration plot as shown Figure S12. Known concentration of HCOOH was plotted with the O.D. value in UV-vis spectra to obtain it.

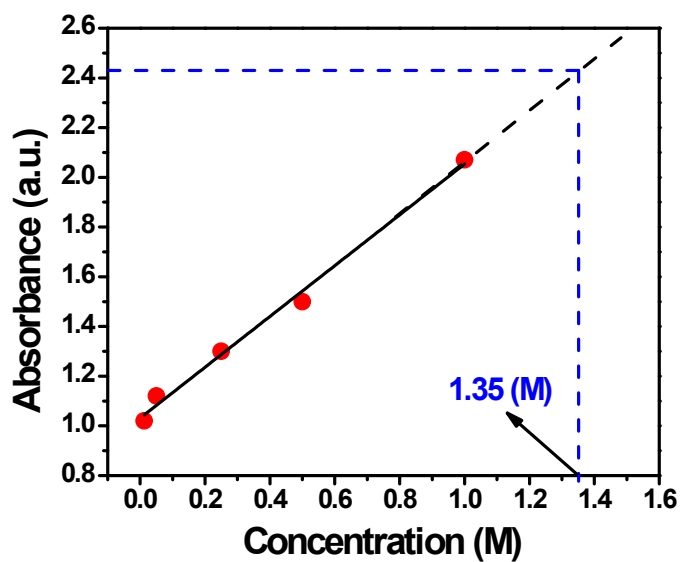

**Figure S12.** Calibration curve of formic acid for determination of concentration of Formic acid produced.

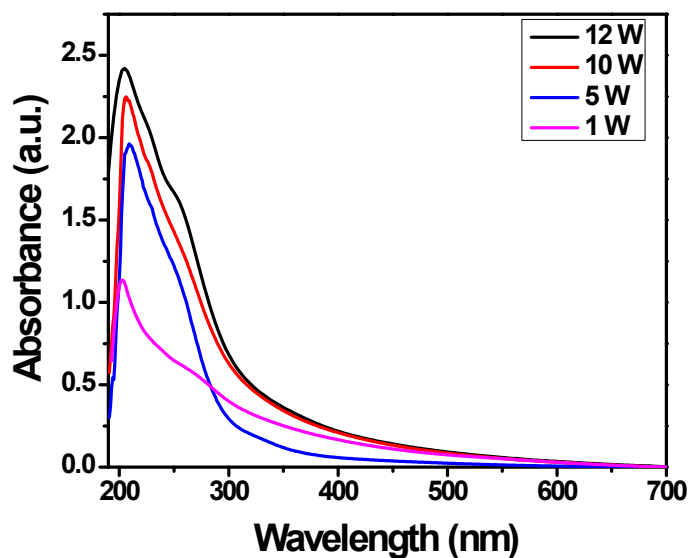

**Figure S13.** UV Spectra of HCOOH in H<sub>2</sub>O for different intensities of light.

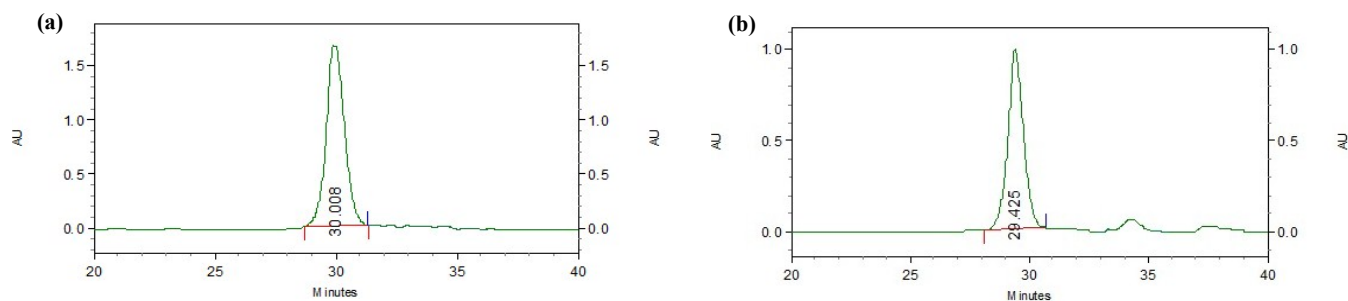

**Figure S14.** HPLC chromatogram for the analysis of formic acid, (a) pure 1 M formic acid as standard, (b) reaction mixture after photocatalysis. Column: C18, mobile phase: 5% methanol + 0.01 M KH<sub>2</sub>PO<sub>3</sub> acidified to pH 2.5 via H<sub>3</sub>PO<sub>3</sub>, flowrate: 0.2 ml/min, injection volume: 20  $\mu$ l, UV wavelength: 206 nm.

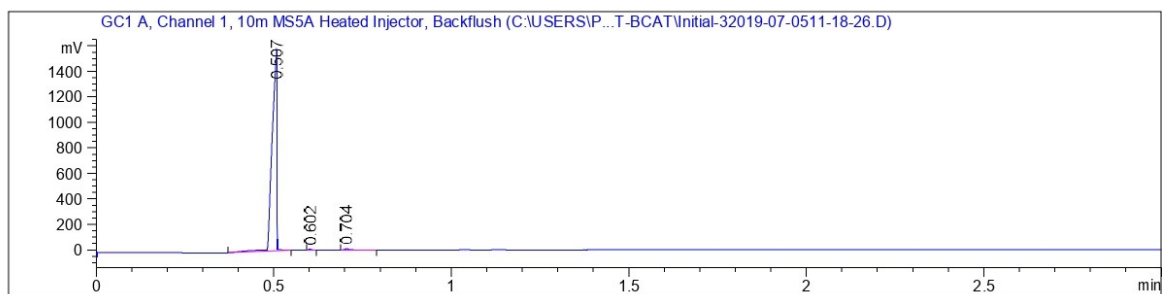

(a) CO<sub>2</sub> standard

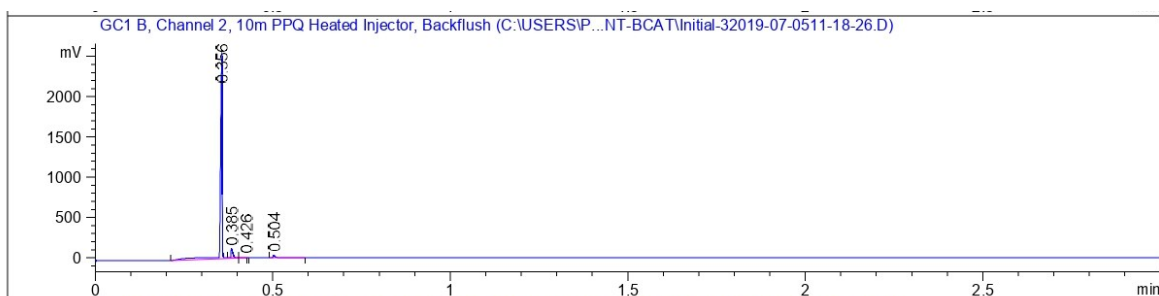

(b) H<sub>2</sub> standard

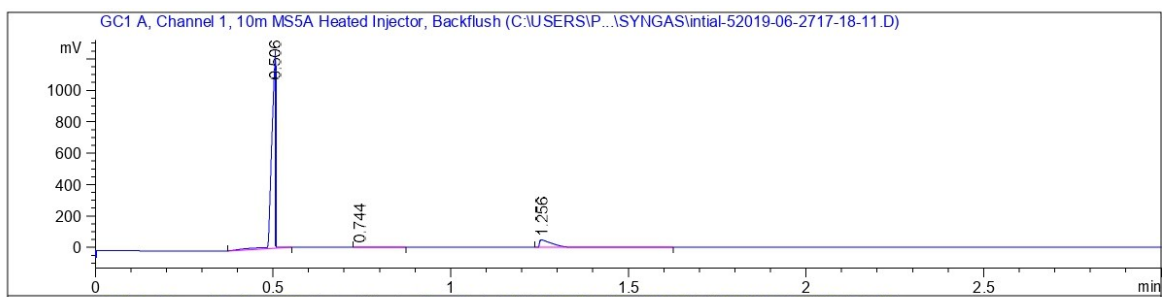

(c) Syngas Propylene(0.506 min) + CO (1.25 min)

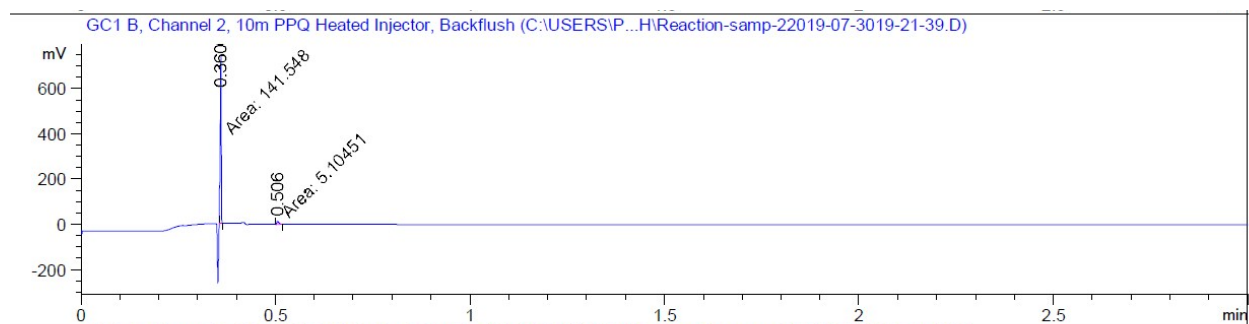

(d) Reaction mixture after photocatalysis

**Figure S15.** GC chromatogram (a) CO<sub>2</sub> standard, (b) H<sub>2</sub> standard, (c) Syngas Propylene(0.506 min) + CO (1.25 min), (d) Reaction mixture after photocatalysis.

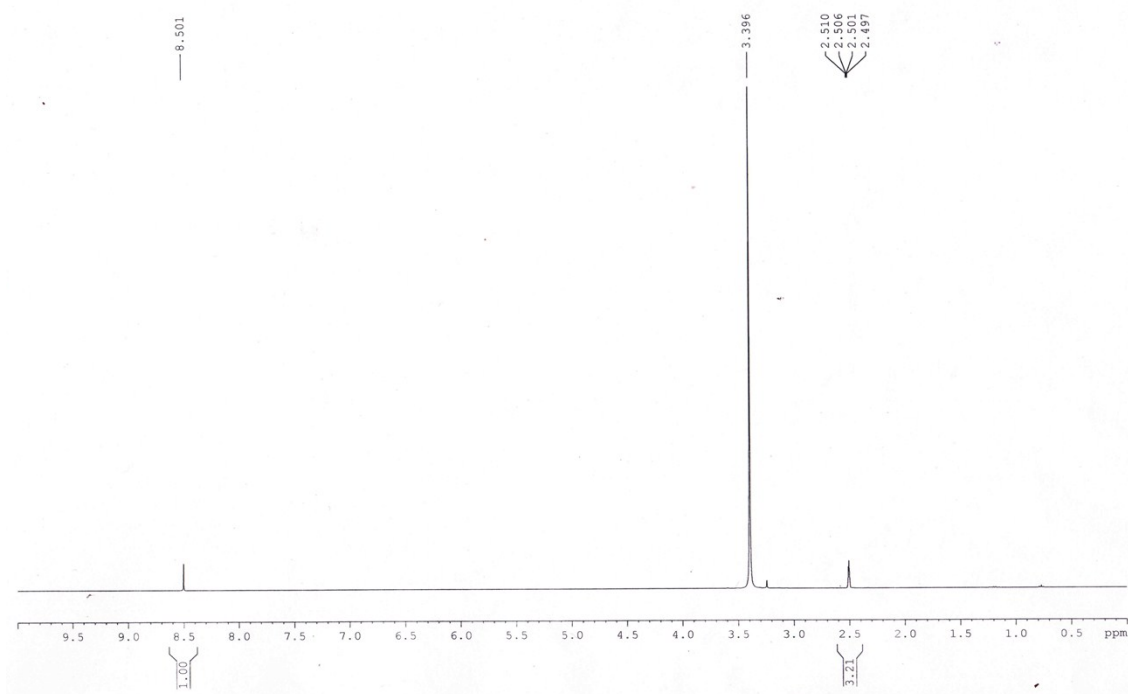

**Figure S16.**  $^1\text{H}$  NMR spectra of formic acid

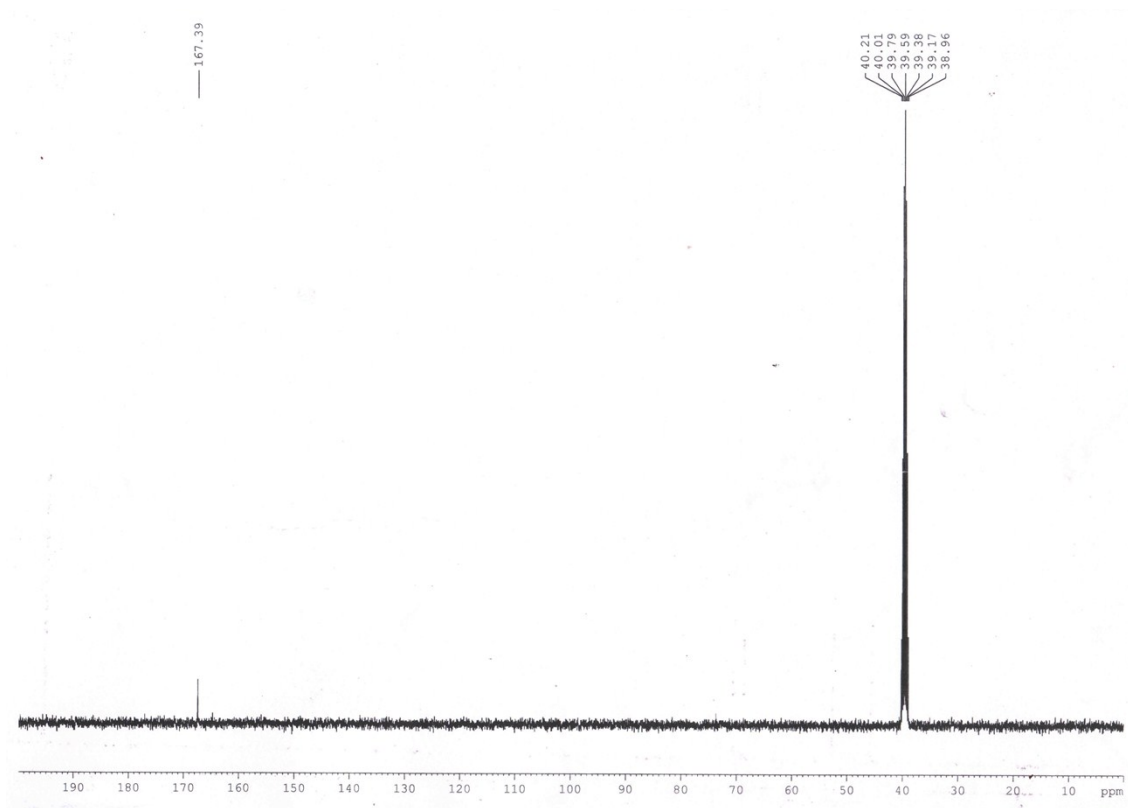

**Figure S17.**  $^{13}\text{C}$  NMR spectra of formic acid

## References:

- [1] P. Zhang, I. Lo, D. O'Connor, S. Pehkonen, H. Cheng, D. Hou, *Journal of Colloid and Interface Science*, **2017**, *508*, 39-48.
- [2] W. Kaewprachum, S. Wongsakulphasatch, W. Kiatkittipong, A. Striolo, C. K. Cheng, S. Assabumrungrat, *Journal of Environmental Chemical Engineering*, DOI:10.1016/j.jece.2019.102920.
- [3] D. Chandra, N. Mukherjee, A. Mondal, and A. Bhaumik, *J. Phys. Chem. C*, **2008**, *112*, 8668–8674.
- [4] P. S. Patil, R. K. Kavar, T. Seth, D. I. Amalnerkar, P. S. Chigare, *Ceram. Int.*, **2003**, *29*, 725-734.
- [5] A. H. Chowdhury, P. Bhanja, N. Salam, A. Bhaumik, S. M. Islam, *Molecular Catalysis*, **2018**, *450*, 46–54.
- [6] Q. Zhao, D. Ju, X. Deng, J. Huang, B. Cao, X. Xu, *Scientific Reports*, **2015**, *5*, 7874.
- [7] B. Cheng, J. M. Russell, W. Shi, L. Zhang, and E. T. Samulski, *J. AM. CHEM. SOC.* **2004**, *126*, 5972-5973.
- [8] J. Senthilnathan, L. Philip, *Chemical Engineering Journal*, **2010**, *161*, 83–92.
